# Supplementary material for: Voluntary Exercise to Reduce Anxiety Behaviour in Traumatic Brain Injury Shown to Alleviate Inflammatory Brain Response in Mice
Source: MDPI journal article supplement (doi:10.3390/ijms24076365), 2023-03-28
Supplement: s1 [file s1]

# Voluntary Exercise-Induced Reduction of Inflammatory Response is Involved in Anxiety Behavior Alleviation in Traumatic Brain Injury Mice

## Supplementary Materials

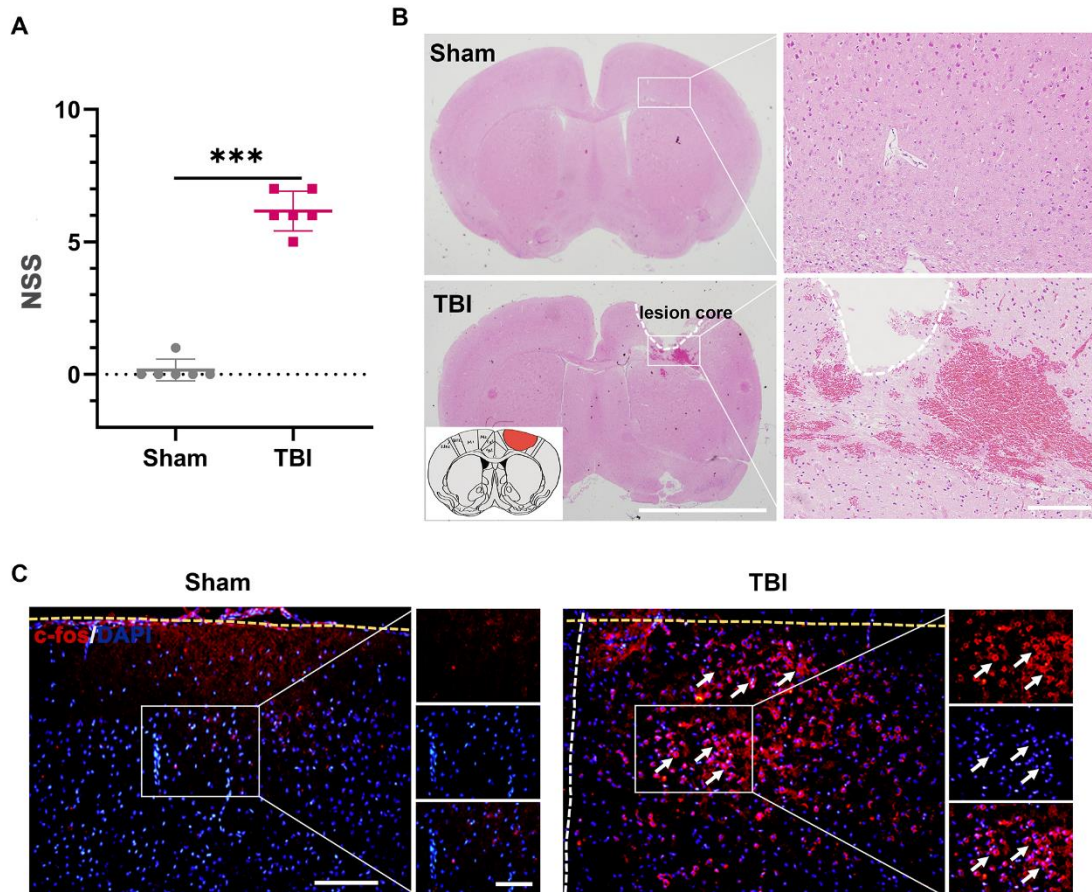

Figure S1. Damage to neurological function and brain tissue. **(A)** Neurological dysfunction, showed by NSS, was observed at 2 days after TBI,  $n = 6$ . **(B)** Obvious tissue loss was observed in cerebral cortex,  $n = 3$ . **(C)** The number of c-fos positive damaged neurons detected at 1.5 hours post-TBI in perilesional cortex increased significantly,  $n = 3$ . \*\*\* $p < 0.0001$  vs. Sham. Unpaired student's  $t$  test. scale bar = 100  $\mu\text{m}$ . NSS, neurological severity score; TBI, traumatic brain injury; H&E, hematoxylin-eosin.

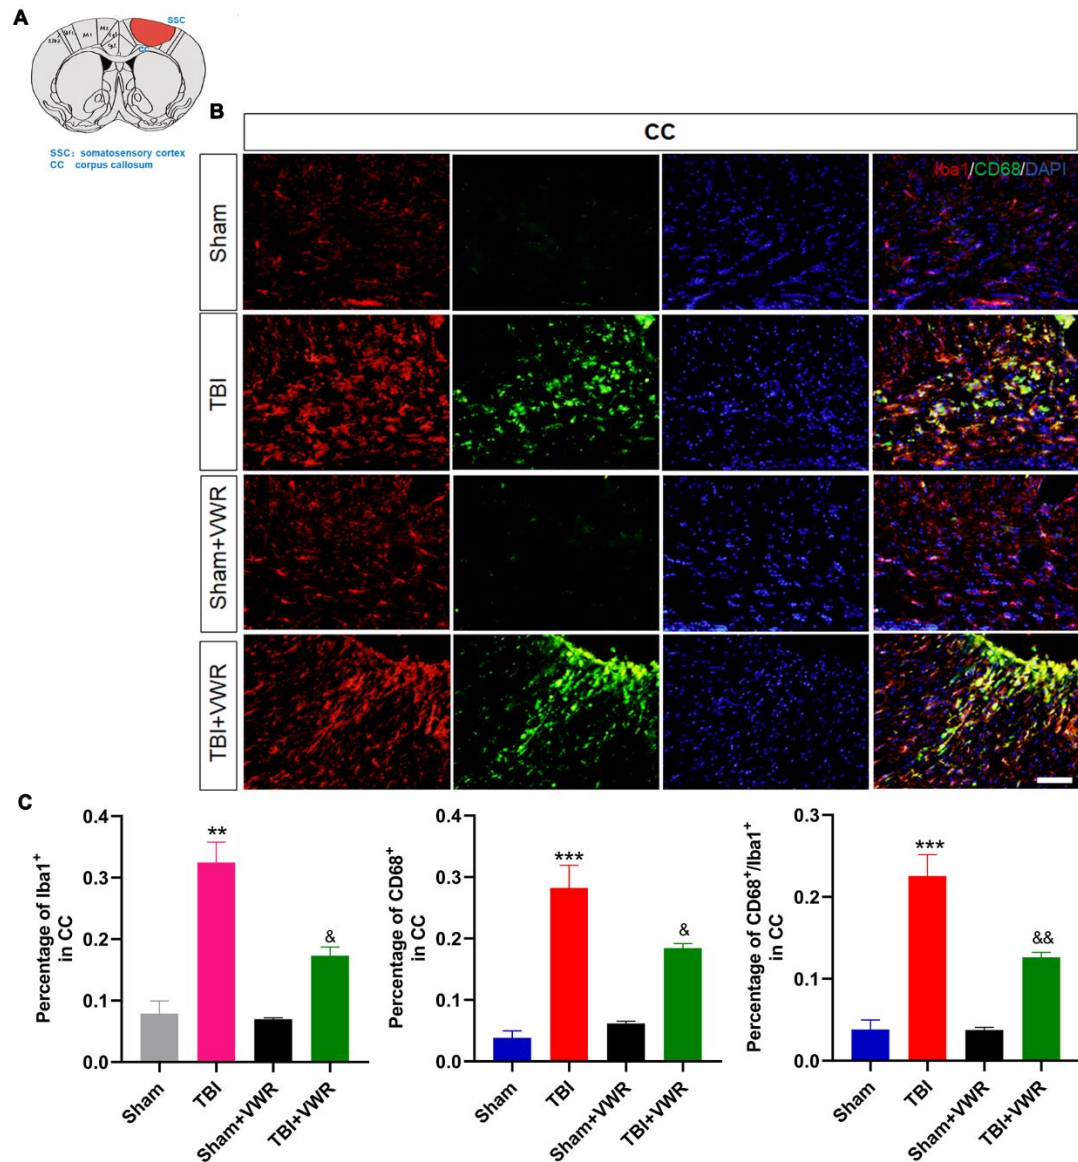

Figure S2. Activation of microglia after TBI in the CC. (A) Illustration of structural divisions in cerebral cortex. (B-C) The number of Iba1<sup>+</sup> cells, CD68<sup>+</sup> cells and Iba1<sup>+</sup>/CD68<sup>+</sup> cells increased significantly after TBI and decreased after VWR. \*\*\* $p < 0.0001$ , \*\* $p < 0.01$  vs. Sham, & $p < 0.01$ , & $p < 0.05$  vs. TBI. One-way ANOVA, Post-hoc Sidak's multiple comparisons test;  $n = 3$ . Iba1: red; CD68: green; DAPI: blue; scale bar = 100  $\mu$ m. CC, corpus callosum; VWR, voluntary wheel running; TBI, traumatic brain injury.

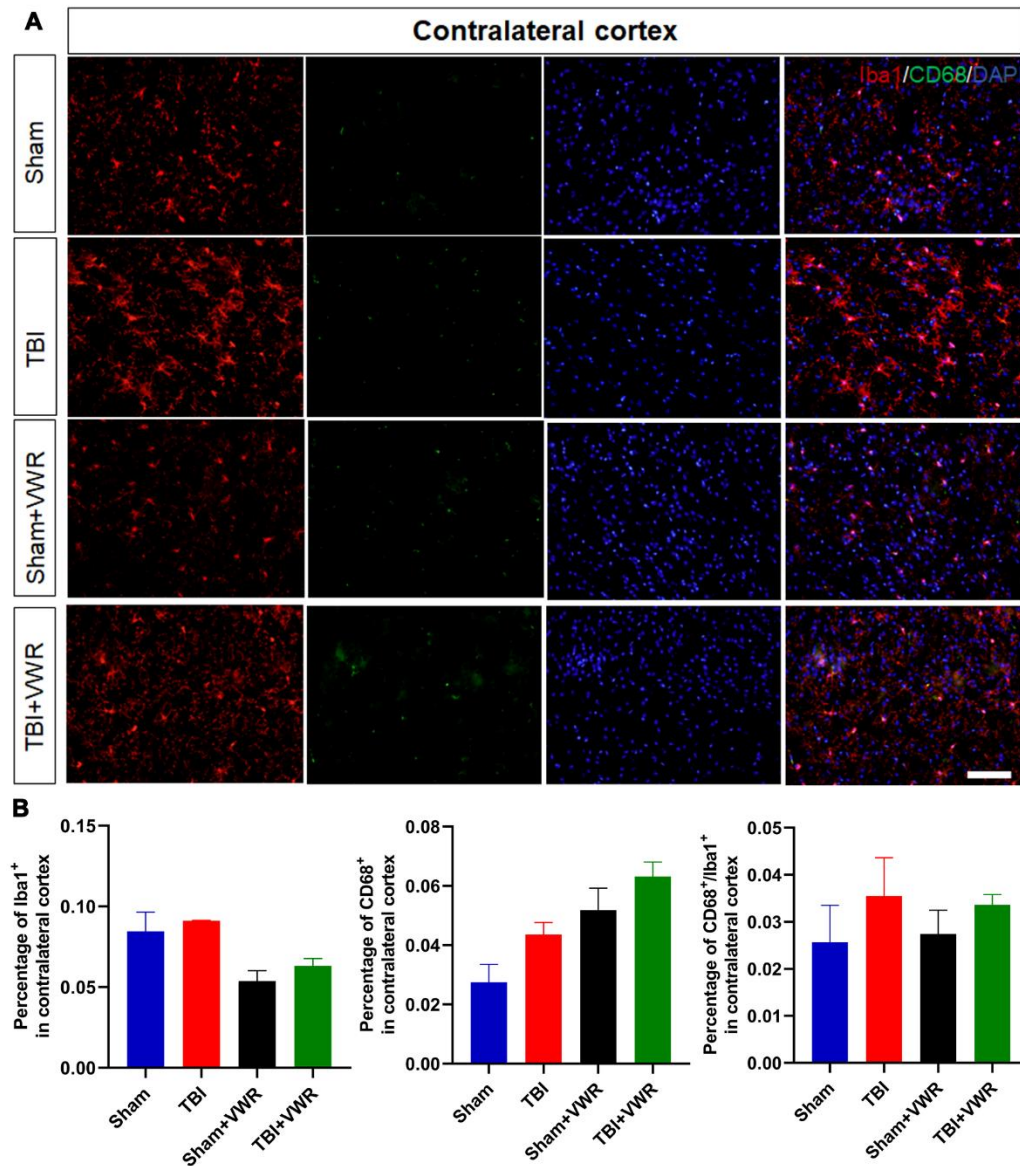

Figure S3. Activation of microglia after TBI in the contralateral cortex. **(A-B)** No significant changes was found regarding the number of Iba1<sup>+</sup>, CD68<sup>+</sup> and Iba1<sup>+</sup>/CD68<sup>+</sup> cells between different groups in the contralateral cerebral cortex. One-way ANOVA, Post-hoc Sidak's multiple comparisons test; n=3. Iba1: red; CD68: green; DAPI: blue; scale bar =100  $\mu$ m. VWR, voluntary wheel running; TBI, traumatic brain injury.
